# Supplementary material for: Using a genetic/clinical risk score to stop smoking (GeTSS): randomised controlled trial
Source: PubMed Central journal article supplement (PMC5653992; doi:10.1186/s13104-017-2831-2), 2017-10-23
Supplement: 13104_2017_2831_MOESM4_ESM.pdf [file 13104_2017_2831_MOESM4_ESM.pdf]

---

**KEY TO FULL TITLES OF COLUMNS D to CY**

---

|                                                                           |                  |
|---------------------------------------------------------------------------|------------------|
| Patient code A/B (A = test group; B = control group)                      | abcode           |
| Age at 1/10/11 <b>deleted</b> for patient confidentiality                 | -                |
| Age band for age at 1/10/11 (5 year bands)                                | ageband          |
| Gender                                                                    | gender           |
| Marital status                                                            | mstat            |
| Age completed education                                                   | educn            |
| Years in education (excluding interruptions)                              | edysr            |
| First prescription of smoking cessn. aid                                  | prescript1       |
| Second prescription of smoking cessn. aid                                 | prescript2       |
| Completed varenicline course Y-N                                          | varenicomplte    |
| Fagerstrom score graded low/medium/high                                   | fagergrade       |
| Pack years                                                                | packyr           |
| Cigarettes (or cigarsx2)/day at start                                     | cigs1            |
| Cigarettes (or cigarsx2)/day at 8 weeks                                   | cigs8wk          |
| Cigarettes (or cigarsx2)/day at 6 months                                  | cigs6m           |
| Cigarettes/day reduction from start of trial to 6-months follow-up clinic | cigsct6m         |
| Fagerstrom score at start                                                 | fager            |
| SmokeScreen cotinine test                                                 | cotinin          |
| Fagerstrom + Smokescreen combined score                                   | fagercot         |
| Weekly CO breath test - 1                                                 | breath1          |
| Weekly CO breath test - 2                                                 | breath2          |
| Weekly CO breath test - 3                                                 | breath3          |
| Weekly CO breath test - 4                                                 | breath4          |
| Weekly CO breath test - 4                                                 | breath5          |
| Weekly CO breath test - 6                                                 | breath6          |
| Weekly CO breath test - 7                                                 | breath7          |
| Weekly CO breath test - 8                                                 | breath8          |
| CO breath test first reading                                              | cofirstrecd      |
| CO breath test low reader at 8 weeks                                      | conegwk8         |
| CO breath test - 6 months                                                 | breath9          |
| Last CO reading up to and including 8 weeks                               | lastcoin8wk      |
| Last CO breath test reading at last clinic attendance                     | lastco           |
| CO or SmokeScreen low reader at 6 months                                  | coneg6m          |
| SmokeScreen score at 6 months                                             | cotinin6         |
| Respiragene score                                                         | respira          |
| Respiragene score genes or genes plus                                     | geneplus         |
| Gene score component of Respiragen risk score                             | onlygenes        |
| Clinical score component of Respiragene risk score                        | onlyclinical     |
| Percentage of respiragene risk score from genes                           | genecent         |
| Respiragene grading                                                       | respirgr         |
| Respiragene score when reach age 60 years                                 | repirasixty      |
| Repiragene grading when reach age 60 years                                | repigrsixty      |
| Lifetime % cancer risk if continues smoking                               | smkrisk          |
| 5 year % cancer risk if continues as non-smoker                           | fiveyrquitrisk   |
| Lung age from spirometry reading                                          | lungage          |
| Excess of lung age over chronological age (years)                         | Lungaging        |
| Grading of lung health                                                    | copdgrade        |
| Hypothetical upgrade if all subjects had COPD                             | hypotheticalcopd |

|                                                                                |                |
|--------------------------------------------------------------------------------|----------------|
| New COPD awarded extra 4 risk points                                           | copdnewfour    |
| Respiragene score upgrades due to new COPD                                     | respirupgrade  |
| "Q" DENOTES VALUES FROM THE QUESTIONNAIRE ADMINISTERED AT 8 WEEKS AND 6 MONTHS |                |
| Q 8 weeks:Stopped after 8 weeks course?                                        | stop8wk        |
| Q 6 months:Stopped at 6 month follow-up?                                       | stop6m         |
| Q 8 weeks:Plan to stop smoking at 8 weeks?                                     | plan8wk        |
| Q 6 months Plan to stop smoking at 8 weeks?                                    | plan6m         |
| Q 8 weeks:How many days since last cig at 8 wk?                                | last8wk        |
| Q 6 months:How many days since last cig at 6 months?                           | last6m         |
| Q 8 weeks:Influence of pressure from family                                    | press8wk       |
| Q 6 months:Influence of pressure from family                                   | press6m        |
| Q 8 weeks:Influence of smoking restrictions                                    | restr8wk       |
| Q 6 months:Influence of smoking restrictions                                   | restr6m        |
| Q 8 weeks:Influence of cost of smoking                                         | cost8wk        |
| Q 6 months:Influence of cost of smoking                                        | cost6m         |
| Q 8 weeks:Current health problems                                              | health8wk      |
| Q 6 months:Current health problems                                             | health6m       |
| Q 8 weeks:Doctor's advice                                                      | docadv8wk      |
| Q 6 months:Doctor's advice                                                     | docadv6m       |
| Q 8 weeks:Factsheet on tobacco risk                                            | fsheet8wk      |
| Q 6 months:Factsheet on tobacco risk                                           | fsheet6m       |
| Q 8 weeks:Result of respiragene test                                           | rresult8wk     |
| Q 6 months :Result of respiragene test                                         | rresult6m      |
| Q 8 weeks:Breath CO results                                                    | coresult8wk    |
| Q 6 months:Breath CO results                                                   | coresult6m     |
| Q 8 weeks:Saliva cotinine test                                                 | cotinine8wk    |
| Q 6 months:Saliva cotinine test                                                | cotinine6m     |
| Q 8 weeks:Clinic support/advice                                                | support8wk     |
| Q 6 months:Clinic support/advice                                               | support6m      |
| Q 8 weeks:Advise friend have lung CA test?                                     | friend8wk      |
| Q 6 months:Advise friend have lung CA test?                                    | friend6m       |
| Q 8 weeks:Advise family member have lung CA test?                              | family8wk      |
| Q 6 months:Advise family member have lung CA test?                             | family6m       |
| How would/didyou feelabout test 8 weeks - code 1                               | hyfcode1 8wk   |
| Howdid/would you feel about test 8 weeks - code 2                              | hyfcode2 8wk   |
| How did/would you feel about test 6m - code 1                                  | hyfcode1 6m    |
| How did/would you feel about test 6m - code 2                                  | hyfcode2 6m    |
| Number of attendances to 8 wk course                                           | attend8wks     |
| Attended 6 month follow-up                                                     | attend6m       |
| Cigarettes/day reduction from start of trial to 6-months follow-up clinic      | cigscut        |
| CO breathalyser difference from start to 6 months                              | codiff6m       |
| CO breathalyser difference from start to last recorded attendance              | cofirsttolast  |
| CO breathalyser difference from start to 8 weeks                               | cofirstto8wks  |
| CO breathalyser difference from start to 8 wk or last reading before 8 wk      | cofirstto8lb8  |
| Respiragene score re-calculated for new COPDs                                  | newcopdrisk    |
| Hypothetical Respiragene scores if all participants had COPD                   | hypocopdclinic |
| Sum of motivators at 6 months                                                  | summotivatr2   |
| Sum of motivators at 8 weeks                                                   | summotivatr1   |
| New Respiragene score after +4 for new COPDs                                   | newcopdscores  |
| Original Respiragene score                                                     | oldrespir      |

Lifetime % cancer risk if continues smoking  
New COPD scores included lifetime % risk if continues smoking

oldlifetime  
newcopdlife

| Codes for individual parameters                              | RESULTS → |         |      |
|--------------------------------------------------------------|-----------|---------|------|
| A = test group; B = control group                            | abcode    | ageband | gend |
|                                                              | B2        | 45-50   | M    |
|                                                              | B3        | 20-25   | M    |
| values only (no code)                                        | B1        | 45-50   | M    |
| values only (no code)                                        | B6        | 35-40   | F    |
| 1=married, 2=single, 3=divorced, 4=widowed                   | B8        | 55-60   | F    |
| values only (no code)                                        | B9        | 50-55   | F    |
| values only (no code)                                        | B10       | 55-60   | F    |
| Codes 1-7 details on sheet 2                                 | B16       | 35-40   | F    |
| Codes 1-5 on sheet 2                                         | B20       | 55-60   | M    |
| 1=completed course of varenicline, 2=never completed         | B24       | 20-25   | M    |
| 1=low score, 2=medium score, 3=high score                    | B26       | 20-25   | M    |
| values only (no code)                                        | B28       | 65-70   | F    |
| values only (no code)                                        | B29       | 55-60   | F    |
| values only (no code)                                        | B32       | 50-55   | F    |
| values only (no code)                                        | B33       | 60-65   | M    |
| values only (no code)                                        | B34       | 65-70   | M    |
| values only (no code)                                        | B42       | 55-60   | F    |
| values only (no code)                                        | B44       | 45-50   | F    |
| values only (no code)                                        | B46       | 45-50   | M    |
| values only (no code)                                        | B47       | 30-35   | M    |
| values only (no code)                                        | B52       | 65-70   | M    |
| values only (no code)                                        | B25       | 60-65   | F    |
| values only (no code)                                        | A18       | 65-70   | M    |
| values only (no code)                                        | A19       | 60-65   | M    |
| values only (no code)                                        | A56       | 60-65   | M    |
| values only (no code)                                        | A58       | 50-55   | F    |
| values only (no code)                                        | A60       | 60-65   | M    |
| values only (no code)                                        | A26       | 55-60   | M    |
| 0=failed to attend at 8 wk, 1=low reading, 2=smokers reading | A30       | 60-65   | F    |
| values only (no code)                                        | A55       | 40-45   | M    |
| values only (no code)                                        | B41       | 60-65   | F    |
| values only (no code)                                        | B54       | 40-45   | F    |
| 0=failed to attend at 6 m, 1=low reading, 2=smokers reading  | A5        | 65-70   | F    |
| values only (no code)                                        | A8        | 50-55   | F    |
| values only (no code)                                        | A46       | 45-50   | M    |
| 1=gene score only, 2=gene score + clinical score             | B17       | 55-60   | M    |
| values only (no code)                                        | B51       | 45-50   | M    |
| values only (no code)                                        | A7        | 65-70   | M    |
| values only (no code)                                        | A12       | 45-50   | F    |
| 1-average risk, 2=high risk, 3=very high risk                | B56       | 35-40   | M    |
| values only (no code)                                        | A17       | 65-70   | M    |
| values only (no code)                                        | A48       | 60-65   | F    |
| values only (no code)                                        | B45       | 55-60   | F    |
| values only (no code)                                        | A1        | 45-50   | M    |
| values only (no code)                                        | A3        | 35-40   | M    |
| values only (no code)                                        | A4        | 40-45   | M    |
| Codes 0-4 details on sheet 2                                 | A11       | 50-55   | F    |
| values only (no code)                                        | A13       | 35-40   | F    |

values only (no code)  
Codes 0-4 details on sheet 2  
  
0=lost to follow-up, 1=yes, 2=no  
0=lost to follow-up, 1=yes, 2=no  
0=stopped, 1=yes, 2=no, 3=don't know  
0=stopped, 1=yes, 2=no, 3=don't know  
values only (no code)  
values only (no code)  
Codes -1 to 5 details on sheet 2  
0=no entry, 1=yes, 2=no, 3=unsure  
Codes 0-6 details on sheet 2  
values only (no code)  
0=failed to attend, 1=attended  
values only (no code)  
values only (no code)

A21 45-50 F  
A23 30-35 M  
A28 55-60 F  
A33 40-45 F  
A34 50-55 F  
A38 35-40 F  
A39 35-40 F  
A43 45-50 M  
A44 30-35 F  
A50 30-35 F  
A51 55-60 F  
A54 50-55 F  
A57 30-35 M  
A59 55-60 F  
A61 45-50 F  
A62 20-25 M  
B19 50-55 M  
B23 40-45 F  
B43 45-50 F

values only (no code)  
values only (no code)

|

| mstat | educn | edys | prescript1 | prescript2 | varenicom | fagergrade | packyr | cigs1 |
|-------|-------|------|------------|------------|-----------|------------|--------|-------|
| 3     | 17    | 17   | 1          | 0          | 1         | 2          | 30     | 40    |
| 2     | 16    | 16   | 1          | 0          | 1         | 1          | 1      | 12    |
| 2     | 18    | 18   | 1          | 0          | 1         | 1          | 10     | 20    |
| 1     | 25    | 25   | 3          | 0          | 2         | 0          | 6      | 10    |
| 3     | 11    | 11   | 6          | 0          | 2         | 2          | 23     | 10    |
| 1     | 16    | 16   | 1          | 0          | 1         | 1          | 32     | 20    |
| 1     | 16    | 16   | 1          | 0          | 1         | 0          | 25     | 10    |
| 2     | 19    | 19   | 1          | 0          | 1         | 2          | 9      | 15    |
| 1     | 15    | 15   | 2          | 4          | 2         | 0          | 44     | 22    |
| 2     | 16    | 16   | 1          | 0          | 1         | 0          | 14     | 10    |
| 2     | 17    | 17   | 1          | 0          | 1         | 0          | 5      | 15    |
| 1     | 21    | 21   | 4          | 0          | 2         | 0          | 33     | 20    |
| 3     | 15    | 15   | 4          | 0          | 2         | 0          | 29     | 20    |
| 1     | 16    | 16   | 1          | 0          | 1         | 0          | 55     | 15    |
| 1     | 49    | 20   | 2          | 0          | 2         | 0          | 24     | 10    |
| 1     | 17    | 17   | 1          | 0          | 1         | 1          | 14     | 10    |
| 1     | 16    | 16   | 1          | 0          | 1         | 0          | 36     | 15    |
| 1     | 21    | 21   | 8          | 0          | 2         | 0          | 26     | 15    |
| 2     | 19    | 19   | 1          | 0          | 1         | 1          | 53     | 30    |
| 2     | 18    | 18   | 1          | 0          | 1         | 1          | 13     | 20    |
| 1     | 15    | 15   | 1          | 0          | 1         | 1          | 32     | 20    |
| 3     | 16    | 16   | 1          | 0          | 1         | 0          | 55     | 20    |
| 1     | 15    | 15   | 2          | 4          | 2         | 2          | 41     | 20    |
| 1     | 16    | 16   | 1          | 0          | 1         | 2          | 68     | 30    |
| 1     | 15    | 15   | 1          | 0          | 1         | 0          | 47     | 20    |
| 3     | 16    | 16   | 6          | 0          | 2         | 1          | 35     | 20    |
| 1     | 16    | 16   | 1          | 0          | 1         | 1          | 54     | 10    |
| 1     | 19    | 19   | 1          | 0          | 1         | 2          | 41     | 20    |
| 1     | 16    | 16   | 1          | 0          | 1         | 0          | 21     | 15    |
| 3     | 21    | 21   | 1          | 0          | 1         | 0          | 19     | 10    |
| 3     | 17    | 17   | 1          | 0          | 1         | 1          | 43     | 20    |
| 1     | 17    | 17   | 6          | 0          | 2         | 1          | 60     | 40    |
| 1     | 19    | 19   | 1          | 0          | 1         | 1          | 50     | 15    |
| 3     | 40    | 26   | 2          | 4          | 2         | 2          | 26     | 15    |
| 1     | 16    | 16   | 1          | 0          | 1         | 2          | 39     | 25    |
| 2     | 15    | 15   | 1          | 0          | 1         | 2          | 45     | 15    |
| 2     | 16    | 16   | 6          | 0          | 2         | 2          | 37     | 20    |
| 1     | 19    | 19   | 1          | 0          | 1         | 1          | 54     | 12    |
| 3     | 19    | 19   | 6          | 0          | 2         | 2          | 39     | 25    |
| 2     | 16    | 16   | 3          | 4          | 2         | 2          | 38     | 30    |
| 1     | 16    | 16   | 1          | 0          | 1         | 0          | 48     | 10    |
| 1     | 21    | 21   | 6          | 0          | 2         | 0          | 22     | 15    |
| 3     | 15    | 15   | 6          | 0          | 2         | 1          | 39     | 17    |
| 1     | 18    | 18   | 1          | 0          | 1         | 0          | 32     | 12    |
| 1     | 21    | 21   | 2          | 0          | 2         | 0          | 9      | 10    |
| 1     | 16    | 16   | 2          | 0          | 2         | 2          | 27     | 20    |
| 1     | 16    | 16   | 3          | 0          | 2         | 1          | 35     | 20    |
| 2     | 28    | 28   | 7          | 0          | 2         | 2          | 20     | 20    |

|   |    |    |   |   |   |   |    |    |
|---|----|----|---|---|---|---|----|----|
| 2 | 19 | 19 | 1 | 0 | 1 | 1 | 18 | 15 |
| 1 | 20 | 20 | 3 | 0 | 2 | 2 | 20 | 20 |
| 4 | 16 | 16 | 3 | 0 | 2 | 1 | 30 | 15 |
| 1 | 16 | 16 | 6 | 0 | 2 | 1 | 27 | 15 |
| 3 | 15 | 15 | 1 | 0 | 1 | 1 | 38 | 18 |
| 1 |    | 19 | 1 | 0 | 1 | 2 | 22 | 20 |
| 2 | 18 | 18 | 3 | 0 | 2 | 1 | 14 | 15 |
| 1 | 15 | 15 | 6 | 0 | 2 | 2 | 41 | 25 |
| 2 | 18 | 18 | 6 | 0 | 2 | 2 | 14 | 10 |
| 2 | 16 | 16 | 6 | 0 | 2 | 1 | 31 | 25 |
| 1 | 17 | 17 | 4 | 0 | 2 | 0 | 44 | 20 |
| 1 | 16 | 16 | 6 | 0 | 2 | 2 | 34 | 20 |
| 2 | 16 | 16 | 1 | 0 | 1 | 0 | 20 | 20 |
| 1 | 24 | 24 | 6 | 0 | 2 | 1 | 31 | 20 |
| 2 | 18 | 18 | 8 | 0 | 2 | 1 | 38 | 30 |
| 2 | 17 | 17 | 1 | 0 | 1 | 2 | 8  | 20 |
| 1 | 22 | 22 | 1 | 0 | 1 | 0 | 7  | 10 |
| 1 | 29 | 29 | 2 | 0 | 2 | 0 | 21 | 10 |
| 3 | 16 | 16 | 1 | 0 | 1 | 2 | 40 | 20 |





| cigs8wk | cigs6m | cigsct6m | fager | cotinin | fagercot | breath1 | breath2 | breath3 |
|---------|--------|----------|-------|---------|----------|---------|---------|---------|
| 10      | 25     | 15       | 7     | 3       | 10       | 57      | 56      | 50      |
| 0       | 0      | 12       | 5     | 1       | 6        |         | 12      |         |
| 0       | 0      | 20       | 4     |         |          |         | 12      | 9       |
| 0       | 0      | 10       | 1     | 1       | 2        | 9       |         |         |
| 0       | 0      | 10       | 8     | 3       | 11       | 17      |         | 3       |
| 0       | 0      | 20       | 5     | 3       | 8        | 44      | 25      | 11      |
| 0       | 7      | 3        | 3     | 1       | 4        | 7       | 11      | 4       |
| 0       | 0      | 15       | 7     | 2       | 9        | 30      | 22      |         |
| 2       | 0      | 22       | 2     | 3       | 5        | 21      | 21      | 17      |
| 3       | 0      | 10       | 3     | 2       | 5        | 14      | 24      | 21      |
| 0       |        |          | 2     | 2       | 4        | 25      | 16      | 10      |
| 0       | 0      | 20       | 3     | 3       | 6        |         | 14      | 15      |
| 5       | 0      | 20       | 9     | 2       | 11       | 26      |         |         |
| 0       | 0      | 15       | 6     | 2       | 8        | 44      | 34      | 32      |
| 0       | 6      | 4        | 1     | 1       | 2        | 20      | 19      |         |
| 0       | 4      | 6        | 4     | 3       | 7        | 19      | 2       |         |
| 0       | 0      | 15       | 3     | 2       | 5        | 40      | 23      | 28      |
| 6       | 6      | 9        | 1     | 3       | 4        |         |         |         |
| 0       |        |          | 6     | 2       | 8        | 9       | 24      | 3       |
| 0       |        |          | 5     | 2       | 7        | 34      | 20      |         |
| 3       | 5      | 15       | 4     | 2       | 6        | 25      | 20      | 12      |
| 0       | 3      | 17       | 2     | 3       | 5        | 39      | 25      | 4       |
| 12      | 10     | 10       | 7     | 3       | 10       | 31      | 24      |         |
| 0       | 0      | 30       | 7     | 2       | 9        | 17      | 18      | 3       |
| 0       | 0      | 20       | 5     | 3       | 8        | 15      | 17      | 15      |
| 0       | 0      | 20       | 5     | 3       | 8        | 17      | 28      | 3       |
| 0       | 0      | 10       | 4     | 3       | 7        | 19      | 10      | 13      |
| 0       | 15     | 5        | 8     | 1       | 9        | 11      | 6       | 6       |
| 0       | 3      | 12       | 2     | 3       | 5        | 19      |         | 15      |
| 0       | 1      | 9        | 3     | 3       | 6        | 9       | 3       | 2       |
| 0       | 2      | 18       | 5     | 2       | 7        | 35      | 23      | 20      |
| 18      | 38     | 2        | 6     | 3       | 9        | 23      | 18      | 17      |
| 0       | 0      | 15       | 5     | 3       | 8        | 11      | 11      | 7       |
| 3       | 8      | 7        | 7     | 3       | 10       | 18      |         |         |
| 0       | 10     | 15       | 7     | 3       | 10       | 22      | 26      | 19      |
| 0       | 15     | 0        | 7     | 3       | 10       | 14      | 14      | 16      |
| 1       | 6      | 14       | 8     | 3       | 11       | 30      |         |         |
| 0       | 0      | 12       | 5     | 2       | 7        | 21      |         | 5       |
| 0       | 0      | 25       | 7     | 3       | 10       | 45      | 49      | 4       |
| 0       | 30     | 0        | 8     | 3       | 11       | 49      | 47      | 50      |
| 0       | 0      | 10       | 1     | 1       | 2        | 6       | 4       | 11      |
| 10      | 15     | 0        | 3     | 2       | 5        | 21      | 16      |         |
| 13      | 15     | 2        | 4     | 2       | 6        | 13      |         | 11      |
| 0       | 0      | 12       | 1     | 2       | 3        | 24      | 12      | 2       |
| 2       | 5      | 5        | 2     | 2       | 4        | 27      | 30      | 26      |
| 0       | 20     | 0        | 4     | 3       | 7        | 19      | 21      | 2       |
| 20      | 20     | 0        | 4     |         |          | 33      |         |         |
| 1       | 15     | 5        | 8     | 2       | 10       | 33      | 32      | 32      |

|    |    |    |   |   |    |    |    |    |
|----|----|----|---|---|----|----|----|----|
| 0  | 12 | 3  | 4 | 1 | 5  | 25 | 25 | 20 |
| 0  | 20 | 0  | 8 | 2 | 10 | 28 | 31 | 28 |
| 4  | 10 | 5  | 5 | 2 | 7  | 21 | 25 | 24 |
| 5  | 10 | 5  | 4 | 2 | 6  | 36 | 30 | 4  |
| 0  |    |    | 6 | 3 | 9  | 36 | 34 | 13 |
| 0  | 12 | 8  | 7 | 2 | 9  | 41 | 31 | 29 |
| 5  | 6  | 9  | 6 | 3 | 9  |    |    |    |
| 20 | 13 | 12 | 9 | 3 | 12 | 22 | 15 | 2  |
| 0  |    |    | 7 | 3 | 10 | 20 | 2  | 2  |
| 12 | 10 | 15 | 5 | 3 | 8  | 40 |    | 3  |
| 0  | 10 | 10 | 3 | 3 | 5  | 9  | 5  | 3  |
| 0  | 0  | 20 | 9 | 3 | 12 | 29 |    |    |
| 0  | 18 | 2  | 7 | 1 | 4  | 15 | 28 | 20 |
| 10 | 5  | 15 | 4 | 3 | 7  | 15 | 12 |    |
| 30 | 20 | 10 | 6 | 3 | 9  | 36 | 29 |    |
| 0  | 10 | 10 | 7 | 3 | 10 |    | 8  | 32 |
| 0  | 3  | 7  | 0 | 2 | 2  | 22 |    | 3  |
| 0  | 12 | -2 | 2 | 3 | 5  | 6  | 8  |    |
| 10 | 10 | 10 | 9 | 3 | 12 | 36 |    | 23 |



| breath4 | breath5 | breath6 | breath7 | breath8 | cofirstrecd | conegwk8 | breath9 | lastcoin8w |
|---------|---------|---------|---------|---------|-------------|----------|---------|------------|
|         | 35      |         |         | 29      | 57          | 2        |         | 29         |
|         |         | 1       |         |         | 12          | 0        |         | 1          |
|         | 2       |         | 2       | 1       | 12          | 1        | 4       | 1          |
|         |         |         |         |         | 9           | 0        | 5       | 9          |
|         | 2       | 1       | 1       | 1       | 17          | 1        | 5       | 1          |
| 2       | 2       |         |         | 1       | 44          | 1        | 2       | 2          |
| 2       |         |         |         |         | 7           | 0        |         | 2          |
|         |         |         |         |         | 30          | 0        |         | 22         |
|         | 20      |         |         | 18      | 21          | 2        |         | 18         |
|         |         |         | 12      |         | 14          | 0        | 4       | 12         |
|         | 4       |         | 4       | 5       | 25          | 1        |         | 5          |
| 13      | 6       | 4       |         | 2       | 14          | 1        |         | 2          |
|         |         |         |         |         | 26          | 0        | 3       | 26         |
| 2       | 4       | 2       | 2       | 1       | 44          | 1        | 3       | 8          |
|         |         |         |         |         | 20          |          |         | 19         |
|         |         |         |         |         | 19          |          |         | 2          |
|         | 1       | 2       | 2       | 3       | 40          | 1        | 1       | 1          |
|         |         |         |         |         |             | 0        |         | 4          |
| 1       |         |         | 3       | 4       | 9           | 1        |         | 4          |
| 5       | 2       |         | 2       | 4       | 34          | 1        |         | 4          |
| 9       |         | 11      | 24      |         | 25          | 0        |         | 24         |
| 2       | 1       | 1       |         | 1       | 39          | 1        | 6       | 1          |
|         |         |         |         |         | 31          | 0        |         | 24         |
| 2       | 2       |         |         | 2       | 17          | 1        | 4       | 2          |
|         | 5       | 3       | 6       |         | 15          | 1        |         | 6          |
| 2       |         |         |         |         | 17          | 0        | 2       | 2          |
| 1       | 2       | 2       | 1       | 1       | 19          | 1        | 2       | 1          |
|         | 7       | 4       |         | 3       | 11          | 1        | 29      | 3          |
| 13      | 2       | 1       | 1       | 1       | 19          | 1        | 8       | 1          |
|         | 1       |         | 2       | 3       | 9           | 1        |         | 3          |
|         | 0       |         | 5       | 1       | 35          | 1        | 6       | 1          |
|         |         | 17      | 19      | 12      | 23          | 2        | 1       | 12         |
| 6       |         | 1       |         | 1       | 11          | 1        |         | 1          |
|         |         |         |         |         | 18          | 0        |         | 18         |
| 1       | 2       | 4       |         | 2       | 22          | 1        |         | 2          |
| 3       | 2       | 2       | 3       | 1       | 14          | 1        | 14      | 1          |
| 14      | 8       |         |         |         | 30          | 0        | 14      | 8          |
| 4       |         | 3       | 4       | 3       | 21          | 1        |         | 3          |
| 2       |         | 2       |         | 3       | 45          | 1        | 4       | 3          |
| 3       | 1       | 1       |         |         | 49          | 0        |         | 1          |
| 3       | 2       | 2       | 3       | 2       | 6           | 1        | 13      | 2          |
|         |         |         |         |         |             | 0        |         | 16         |
|         |         |         |         |         | 13          | 0        |         | 11         |
| 2       | 4       | 2       | 2       | 2       | 24          | 1        | 5       | 2          |
| 12      | 7       |         |         |         | 27          | 0        |         | 7          |
| 2       | 4       | 3       | 2       | 5       | 19          | 1        | 25      | 5          |
|         |         |         |         |         | 33          | 0        |         | 33         |
|         | 1       |         | 2       | 4       | 33          | 1        |         | 4          |

|    |    |   |   |   |    |   |    |    |
|----|----|---|---|---|----|---|----|----|
| 3  |    | 4 | 4 |   | 25 | 0 | 16 | 4  |
| 31 | 7  | 2 |   |   | 28 | 0 |    | 2  |
|    |    |   |   |   | 21 | 0 |    | 24 |
| 9  | 11 |   | 9 | 7 | 36 | 2 | 26 | 7  |
| 2  | 1  |   |   | 3 | 36 | 1 |    | 3  |
| 2  | 2  | 3 | 3 | 1 | 41 | 1 | 25 | 1  |
|    |    |   |   |   |    | 0 |    | 9  |
|    |    |   |   |   | 22 | 0 | 10 | 2  |
| 2  | 5  | 3 | 4 | 3 | 20 | 1 |    | 3  |
| 1  |    |   |   |   | 40 | 0 |    | 1  |
| 3  | 2  | 7 | 2 | 3 | 9  | 1 | 15 | 3  |
|    |    |   |   |   | 29 | 0 |    | 29 |
| 15 | 2  | 7 | 1 | 2 | 15 | 1 |    | 2  |
|    |    |   |   |   | 15 | 0 |    | 12 |
|    |    |   |   |   | 36 | 0 |    | 29 |
| 15 | 4  | 4 | 1 | 3 | 8  | 1 |    | 3  |
| 2  | 3  | 2 |   | 2 | 22 | 1 |    | 2  |
|    |    |   |   |   | 6  | 0 | 19 | 8  |
| 9  | 8  |   |   |   | 36 | 0 | 14 | 8  |



| lastco | coneg6m | cotinin6 | respira | geneplus | onlygenes | onlyclinical | genecent | respirgr |
|--------|---------|----------|---------|----------|-----------|--------------|----------|----------|
| 29     | 0       |          |         |          |           |              |          |          |
| 1      | 0       |          |         |          |           |              |          |          |
| 4      | 1       |          |         |          |           |              |          |          |
| 5      | 1       |          |         |          |           |              |          |          |
| 5      | 1       |          |         |          |           |              |          |          |
| 2      | 1       |          |         |          |           |              |          |          |
| 2      | 0       |          |         |          |           |              |          |          |
| 22     | 0       |          |         |          |           |              |          |          |
| 18     | 0       |          |         |          |           |              |          |          |
| 4      | 1       | 0        |         |          |           |              |          |          |
| 5      | 0       |          |         |          |           |              |          |          |
| 2      | 1       | 0        |         |          |           |              |          |          |
| 3      | 1       | 0        |         |          |           |              |          |          |
| 3      | 1       | 0        |         |          |           |              |          |          |
| 19     | 0       |          |         |          |           |              |          |          |
| 2      | 0       |          |         |          |           |              |          |          |
| 1      | 1       | 0        |         |          |           |              |          |          |
| 4      | 0       |          |         |          |           |              |          |          |
| 4      | 0       |          |         |          |           |              |          |          |
| 4      | 0       |          |         |          |           |              |          |          |
| 24     | 0       |          |         |          |           |              |          |          |
| 6      | 2       | 1        | 11      | 2        | 1         | 10           | 9.1      | 3        |
| 24     | 2       | 1        | 9       | 2        | 1         | 8            | 11.1     | 3        |
| 4      | 1       | 0        | 7       | 2        | 1         | 6            | 14.3     | 3        |
| 6      | 1       | 0        | 7       | 2        | 1         | 6            | 14.3     | 3        |
| 2      | 1       | 0        | 6       | 2        | 1         | 5            | 16.7     | 3        |
| 2      | 1       | 0        | 9       | 2        | 2         | 7            | 22.2     | 3        |
| 29     | 2       | 2        | 4       | 2        | 1         | 3            | 25       | 2        |
| 8      | 2       | 3        | 4       | 2        | 1         | 3            | 25       | 2        |
| 3      | 0       |          | 4       | 2        | 1         | 3            | 25       | 2        |
| 6      | 2       | 1        | 8       | 2        | 2         | 6            | 25       | 3        |
| 1      | 2       | 1        | 4       | 2        | 1         | 3            | 25       | 2        |
| 1      | 0       | 0        | 10      | 2        | 3         | 7            | 30       | 3        |
| 18     | 0       |          | 3       | 2        | 1         | 2            | 33.3     | 1        |
| 2      | 2       |          | 3       | 1        | 1         | 2            | 33.3     | 1        |
| 14     | 2       | 3        | 6       | 2        | 2         | 4            | 33.3     | 3        |
| 14     | 2       | 1        | 5       | 2        | 2         | 3            | 40       | 2        |
| 3      | 1       | 0        | 7       | 2        | 3         | 4            | 42.9     | 3        |
| 4      | 1       | 0        | 7       | 2        | 3         | 4            | 42.9     | 3        |
| 1      | 2       | 3        | 7       | 2        | 3         | 4            | 42.9     | 3        |
| 13     | 1       | 0        | 8       | 2        | 4         | 4            | 50       | 3        |
| 16     | 2       |          | 2       | 2        | 1         | 1            | 50       | 1        |
| 11     | 2       | 1        | 6       | 2        | 3         | 3            | 50       | 3        |
| 5      | 1       | 0        | 2       | 1        | 2         | 0            | 100      | 1        |
| 0      | 0       |          | 1       | 1        | 1         | 0            | 100      | 1        |
| 25     | 2       |          | 2       | 1        | 2         | 0            | 100      | 1        |
| 33     | 0       |          | 1       | 1        | 1         | 0            | 100      | 1        |
| 4      | 2       | 1        | 4       | 1        | 4         | 0            | 100      | 2        |



|    |   |   |   |   |   |   |     |   |
|----|---|---|---|---|---|---|-----|---|
| 16 | 2 | 2 | 1 | 1 | 1 | 0 | 100 | 1 |
| 2  | 0 |   | 1 | 1 | 1 | 0 | 100 | 1 |
| 24 | 0 |   | 1 | 1 | 1 | 0 | 100 | 1 |
| 26 | 2 | 3 | 3 | 1 | 3 | 0 | 100 | 1 |
| 3  | 0 |   | 1 | 1 | 1 | 0 | 100 | 1 |
| 25 | 2 | 2 | 2 | 1 | 2 | 0 | 100 | 1 |
| 9  | 2 |   | 1 | 1 | 1 | 0 | 100 | 1 |
| 10 | 2 | 3 | 1 | 1 | 1 | 0 | 100 | 1 |
| 3  | 0 |   | 1 | 1 | 1 | 0 | 100 | 1 |
| 1  | 0 |   | 1 | 1 | 1 | 0 | 100 | 1 |
| 15 | 2 | 2 | 2 | 1 | 2 | 0 | 100 | 1 |
| 29 | 0 |   | 2 | 1 | 2 | 0 | 100 | 1 |
| 2  | 0 |   | 1 | 1 | 1 | 0 | 100 | 1 |
| 12 | 0 |   | 1 | 1 | 1 | 0 | 100 | 1 |
| 29 | 0 |   | 3 | 1 | 3 | 0 | 100 | 1 |
| 3  | 0 |   | 1 | 1 | 1 | 0 | 100 | 1 |
| 2  | 0 |   | 1 | 2 | 1 | 0 | 100 | 1 |
| 19 | 2 | 2 | 4 | 1 | 4 | 0 | 100 | 2 |
| 14 | 2 | 3 | 1 | 1 | 1 | 0 | 100 | 1 |



| repirasixty | repirgrsixtysmkrisk | fiveyrquitri | lungage | Lungaging | copdgrade | hypothetic: | copdnewfo |   |
|-------------|---------------------|--------------|---------|-----------|-----------|-------------|-----------|---|
|             |                     |              |         |           |           | 0           | 4         | 0 |
|             |                     |              |         |           |           | 0           | 4         | 0 |
|             |                     |              | 84      | 37        |           | 3           | 4         | 4 |
|             |                     |              | 37      | 0         |           | 3           | 4         | 4 |
|             |                     |              | 59      | 0         |           | 2           | 4         | 0 |
|             |                     |              | 55      | 5         |           | 1           | 4         | 0 |
|             |                     |              |         |           |           | 0           | 4         | 0 |
|             |                     |              |         | 20        |           | 4           | 0         | 0 |
|             |                     |              |         |           |           | 0           | 4         | 0 |
|             |                     |              | 20      | 0         |           | 1           | 4         | 0 |
|             |                     |              |         |           |           | 0           | 4         | 0 |
|             |                     |              | 66      | 0         |           | 1           | 4         | 0 |
|             |                     |              | 50      | 0         |           | 1           | 4         | 0 |
|             |                     |              | 71      | 18        |           | 3           | 4         | 4 |
|             |                     |              |         |           |           | 0           | 4         | 0 |
|             |                     |              |         |           |           | 0           | 4         | 0 |
|             |                     |              | 57      | 0         |           | 1           | 4         | 0 |
|             |                     |              |         |           |           | 0           | 4         | 0 |
|             |                     |              |         |           |           | 0           | 4         | 0 |
|             |                     |              |         |           |           | 0           | 4         | 0 |
| 11          | 3                   | 60           | 5       | 70        | 8         | 4           | 0         | 0 |
| 9           | 3                   | 50           | 7       |           | 20        | 4           | 0         | 0 |
| 7           | 3                   | 50           | 6       |           | 12        | 4           | 0         | 0 |
| 7           | 3                   | 50           | 3       | 86        | 24        | 3           | 4         | 4 |
| 10          | 3                   | 50           | 3       | 51        | 0         | 3           | 4         | 4 |
| 9           | 3                   | 50           | 3       | 74        | 10        | 1           | 4         | 0 |
| 8           | 3                   | 47           | 4       |           | 32        | 3           | 4         | 4 |
| 4           | 2                   | 15           | 8       | 75        | 0         | 1           | 4         | 0 |
| 8           | 3                   | 40           | 0.5     |           |           | 0           | 4         | 0 |
| 8           | 3                   | 60           | 5       | 91        | 30        | 3           | 4         | 4 |
| 8           | 3                   | 40           | 0.5     | 59        | 19        | 4           | 0         | 0 |
| 10          | 3                   | 50           | 15      | 94        | 35        | 4           | 0         | 0 |
| 7           | 3                   | 37           | 3.5     |           | 0         | 1           | 4         | 0 |
| 7           | 3                   | 44           | 0.5     |           | 11        | 1           | 4         | 0 |
| 10          | 3                   | 55           | 3       | 78        |           | 0           | 4         | 0 |
| 9           | 3                   | 43           | 3       | 59        | 10        | 4           | 0         | 0 |
| 7           | 3                   | 50           | 10      |           | 19        | 3           | 4         | 4 |
| 11          | 3                   | 54           | 3       |           | 8         | 2           | 4         | 0 |
| 11          | 3                   | 60           | 0.5     | 52        | 13        | 3           | 4         | 4 |
| 8           | 3                   | 50           | 10      | 75        | 10        | 3           | 4         | 4 |
| 2           | 1                   | 15           | 6       |           | 16        | 3           | 4         | 4 |
| 10          | 3                   | 60           | 2       | 62        | 6         | 2           | 4         | 0 |
| 6           | 3                   | 30           | 3.5     |           | 18        | 2           | 4         | 0 |
| 4           | 2                   | 19           | 0.5     |           |           | 0           | 4         | 0 |
| 6           | 3                   | 23           | 2       |           | 9         | 2           | 4         | 0 |
| 4           | 2                   | 24           | 3       |           |           | 0           | 4         | 0 |
| 8           | 3                   | 50           | 1       |           | 18        | 2           | 4         | 0 |

|   |   |    |     |    |    |   |   |   |
|---|---|----|-----|----|----|---|---|---|
| 4 | 2 | 22 | 1   |    | 0  | 1 | 4 | 0 |
| 4 | 2 | 19 | 0.5 |    |    | 0 | 4 | 0 |
| 4 | 2 | 15 | 7   |    |    | 0 | 4 | 0 |
| 7 | 3 | 31 | 1   |    | 6  | 2 | 4 | 0 |
| 4 | 2 | 14 | 2   |    |    | 0 | 4 | 0 |
| 6 | 3 | 29 | 0.5 | 69 | 31 | 3 | 4 | 4 |
| 4 | 2 | 18 | 0.5 | 38 | 0  | 1 | 4 | 0 |
| 5 | 2 | 27 | 2   | 58 | 13 | 1 | 4 | 0 |
| 5 | 2 | 22 | 0.5 |    |    | 0 | 4 | 0 |
| 3 | 1 | 16 | 0.5 |    |    | 0 | 4 | 0 |
| 6 | 3 | 38 | 3   | 62 | 4  | 1 | 4 | 0 |
| 6 | 3 | 35 | 3   |    |    | 3 | 4 | 4 |
| 4 | 2 | 17 | 0.5 |    |    | 0 | 4 | 0 |
| 4 | 2 | 32 | 1.5 |    |    | 0 | 4 | 0 |
| 7 | 3 | 43 | 3   |    |    | 0 | 4 | 0 |
| 4 | 2 | 18 | 0.5 |    |    | 0 | 4 | 0 |
| 4 | 2 | 32 | 1.5 |    | 41 | 4 | 0 | 0 |
| 8 | 3 | 40 | 0.5 | 32 | 0  | 1 | 4 | 0 |
| 4 | 2 | 19 | 0.5 | 45 | 0  | 1 | 4 | 0 |



| respirupgrz | stop8wk | stop6m | plan8wk | plan6m | last8wk | last6m | press8wk | press6m |
|-------------|---------|--------|---------|--------|---------|--------|----------|---------|
| 0           | 2       | 2      | 1       | 1      | 1       | 0.1    | 0        | 0       |
| 0           | 1       | 1      | 0       | 0      | 60      | 225    | 4        | 2       |
| 0           | 1       | 1      | 0       | 0      | 18      | 200    | 5        | 4       |
| 0           | 1       | 1      | 0       | 0      | 30      | 210    | 2        | 3       |
| 0           | 1       | 1      | 0       | 0      | 32      | 240    | 5        | 4       |
| 0           | 1       | 1      | 0       | 0      | 28      | 200    | 1        | -1      |
| 0           | 1       | 2      | 0       | 1      | 35      | 1      | 3        | 2       |
| 0           | 1       | 1      | 0       | 0      | 45      | 154    | 4        | 5       |
| 0           | 2       | 1      | 1       | 0      | 0.1     | 110    | 0        | 0       |
| 0           | 2       | 1      | 1       | 0      | 2       | 56     | 1        | 5       |
| 0           | 1       | 0      | 1       |        | 2       |        | 4        |         |
| 0           | 1       | 1      | 0       | 0      | 11      | 210    | 1        | 0       |
| 0           | 2       | 1      | 1       | 0      | 0.1     | 100    | 0        | 0       |
| 0           | 1       | 1      | 0       | 0      | 28      | 170    | 3        | 3       |
| 0           | 1       | 2      | 0       | 1      | 50      | 0.2    | 4        | 0       |
| 0           | 1       | 2      | 0       | 1      | 28      | 1      | 2        | 1       |
| 0           | 1       | 1      | 0       | 0      | 25      | 30.2   | 5        | 3       |
| 0           | 2       | 2      | 1       | 1      | 2       | 0.3    | 4        | 5       |
| 0           | 2       | 0      | 1       |        | 2       |        | 0        |         |
| 0           | 1       | 0      | 0       |        | 21      |        | 2        |         |
| 0           | 2       | 2      | 0       | 1      | 1       | 0.2    | 1        | 4       |
| 1           | 1       | 2      | 0       | 1      | 28      | 3      | 4        | 4       |
| 1           | 2       | 2      | 1       | 0      | 0.1     | 0.1    | 4        | 1       |
| 1           | 1       | 1      | 0       | 0      | 36      | 90     | 3        | 4       |
| 4           | 1       | 1      | 0       | 0      | 18      | 25     | 2        | 3       |
| 4           | 1       | 1      | 0       |        | 42      | 2      | 5        | 4       |
| 1           | 1       | 1      | 0       | 0      | 7       | 28     | 4        | 3       |
| 3           | 1       | 2      | 0       | 1      | 39      | 0.1    | 3        | 3       |
| 1           | 1       | 2      | 0       | 1      | 15      | 0.5    | 3        | 4       |
| 1           | 1       | 2      | 0       | 1      | 5       | 0.5    | 3        | 3       |
| 4           | 2       | 2      | 1       | 1      | 3       | 0.3    | 5        | 0       |
| 1           | 2       | 2      | 1       | 1      | 0.5     | 0.1    | 4        | 4       |
| 1           | 1       | 1      | 0       | 0      | 8       | 21     | 4        | 5       |
| 1           | 2       | 2      | 1       | 3      | 0.2     | 0.1    | 2        | 0       |
| 1           | 1       | 2      | 0       | 1      | 30      | 0.1    | 0        | 0       |
| 1           | 1       | 2      | 0       | 1      | 28      | 1      | 4        | 5       |
| 1           | 2       | 2      | 1       | 1      | 0.5     | 0.2    | 0        | 1       |
| 4           | 1       | 1      | 0       | 0      | 31      | 200    | 2        | 0       |
| 4           | 1       | 1      | 0       | 0      | 30      | 200    | 3        | 4       |
| 4           | 1       | 2      | 0       | 1      | 44      | 0.1    | 3        | 0       |
| 4           | 1       | 1      | 0       | 0      | 27      | 30.5   | 3        | 3       |
| 2           | 2       | 2      | 1       | 1      | 0.1     | 0.1    | 5        | 0       |
| 1           | 2       | 2      | 1       | 3      | 0.1     | 0.1    | 1        | 2       |
| 1           | 1       | 1      | 0       | 0      | 35      | 350    | 5        | 5       |
| 1           | 2       | 2      | 1       | 0      | 2       | 0.1    | 5        | 5       |
| 1           | 1       | 2      | 0       | 1      | 31      | 0.1    | 3        | 3       |
| 1           | 2       | 2      | 1       | 3      | 0.1     | 0.1    | 2        | 1       |
| 1           | 2       | 2      | 1       | 1      | 1       | 0.1    | 5        | 0       |

|   |   |   |   |   |     |     |    |    |
|---|---|---|---|---|-----|-----|----|----|
| 1 | 1 | 2 | 0 | 1 | 15  | 0.1 | -1 | -1 |
| 1 | 2 | 2 | 1 | 1 | 0.1 | 0.1 | 5  | 5  |
| 1 | 2 | 2 | 1 | 1 | 0.5 | 0.1 | 4  | 3  |
| 1 | 2 | 2 | 1 | 1 | 0.1 | 0.1 | 0  | 3  |
| 1 | 1 | 0 | 0 |   | 32  |     | 0  |    |
| 2 | 1 | 2 | 0 | 1 | 22  | 0.1 | 5  | 4  |
| 1 | 2 | 2 | 1 | 1 | 0.2 | 0.2 | 2  | 0  |
| 1 | 2 | 2 | 1 | 3 | 0   | 0.1 | 0  | 3  |
| 1 | 1 | 0 | 0 |   | 37  |     | 1  |    |
| 1 | 2 | 2 | 1 | 1 | 0.1 | 0.1 | 3  | 5  |
| 1 | 1 | 2 | 0 | 1 | 35  | 0.1 | 3  | 2  |
| 2 | 1 | 1 | 0 | 0 | 35  | 17  | 5  | 4  |
| 1 | 1 | 2 | 0 | 1 | 18  | 0.1 | 2  | 3  |
| 2 | 2 | 2 | 1 |   | 0.1 | 0.2 | -1 | 5  |
| 1 | 2 | 2 | 2 | 1 |     | 0.1 |    | -1 |
| 1 | 1 | 2 | 0 | 1 | 15  | 0.2 | 5  | 4  |
| 2 | 1 | 2 | 0 | 1 | 32  | 2   | 0  | 1  |
| 1 | 1 | 2 | 0 | 1 | 42  | 0.1 | 0  | 0  |
| 1 | 2 | 2 | 1 | 1 | 0.1 | 0.2 | 0  | 4  |





| restr8wk | restr6m | cost8wk | cost6m | health8wk | health6m | docadv8wk | docadv6m | fsheet8wk |
|----------|---------|---------|--------|-----------|----------|-----------|----------|-----------|
| 0        | 2       | 4       | 4      | 0         | 0        | 0         | 2        | 3         |
| 0        | 2       | 2       | 3      | 0         | 2        | 0         | 1        | 4         |
| 0        | 0       | 1       | 2      | 1         | 2        | 2         | 2        | 2         |
| 1        | 4       | 1       | 1      | 1         | 1        | 0         | 1        | 0         |
| 0        | 0       | 0       | 4      | 4         | 0        | 4         | 4        | 4         |
| 0        | 0       | 4       | 4      | 4         | 4        | 3         | 0        | 2         |
| 0        | 0       | 3       | 5      | 3         | 0        | 3         | 2        | 2         |
| 3        | 0       | 0       | 1      | 2         | 4        | 3         | 1        | 4         |
| 1        | 0       | 0       | 0      | 0         | 0        | 0         | 1        | 0         |
| 2        | 1       | 2       | 5      | 0         | 0        | 0         | 5        | 2         |
| 2        |         | 3       |        | 1         |          | 2         |          | 2         |
| 0        | 3       | 1       | 3      | 3         | 5        | 4         | 3        | 2         |
| 0        | 0       | 0       | 1      | 5         | 0        | 2         | 0        | 0         |
| 3        | 3       | 4       | 5      | 1         | 3        | 3         | 2        | 2         |
| 0        | 0       | 4       | 0      | 5         | 5        | 3         | 0        | 2         |
| 2        | 0       | 2       | 1      | 5         | 5        | 5         | 4        | 5         |
| 3        | 1       | 4       | 3      | 3         | 0        | 3         | 3        | 3         |
| 0        | 3       | 4       | 4      | 0         | 0        | 2         | 2        | 0         |
| 2        |         | 0       |        | 0         |          | 0         |          | 1         |
| 0        |         | 5       |        | 0         |          | 0         |          | 0         |
| 5        | 0       | 5       | 5      | 5         | 0        | 1         | 1        | 4         |
| 4        | 4       | 4       | 4      | 4         | 2        | 3         | 2        | 4         |
| 2        | 0       | 3       | 3      | 4         | 5        | 4         | 4        | 2         |
| 0        | 1       | 0       | 5      | 0         | 1        | 5         | 5        | 0         |
| 0        | 0       | 1       | 0      | 3         | 0        | 0         | 0        | 0         |
| 0        | 0       | 5       | 2      | 2         | 4        | 5         | 2        | 2         |
| 3        | 2       | 2       | 2      | 4         | 0        | 2         | 3        | 2         |
| 0        | 1       | 2       | 3      | 1         | 0        | 1         | 3        | 2         |
| 2        | 4       | 2       | 2      | 1         | 3        | 1         | 3        | 2         |
| 1        | 0       | 3       | 2      | 3         | 5        | 2         | 2        | 4         |
| 4        | 4       | 5       | 5      | 5         | 4        | 1         | 0        | 2         |
| 0        | 0       | 2       | 2      | 5         | 0        | 4         | 2        | 4         |
| 0        | 0       | 1       | 1      | 5         | 3        | 5         | 4        | 3         |
| 2        | 3       | 0       | 1      | 3         | 1        | 2         | 1        | 3         |
| 0        | 0       | 3       | 4      | 0         | 4        | 0         | 3        | 2         |
| 0        | 1       | 4       | 3      | 5         | 4        | 5         | 5        | 4         |
| 0        | 1       | 2       | 4      | 5         | 3        | 4         | 3        | 4         |
| 0        | 3       | 5       | 5      | 0         | 0        | 2         | 2        | 2         |
| 0        | 2       | 0       | 0      | 2         | 2        | 0         | 0        | 2         |
| 2        | 2       | 5       | 4      | 3         | 0        | 3         | 0        | 2         |
| 0        | 3       | 1       | 1      | 5         | 2        | 5         | 3        | 3         |
| 0        | 0       | 0       | 0      | 0         | 0        | 0         | 0        | 2         |
| 1        | 3       | 4       | 4      | 0         | 3        | 1         | 3        | 1         |
| 1        | 2       | 0       | 1      | 0         | 0        | 1         | 2        | 1         |
| 4        | 4       | 1       | 4      | 1         | 1        | 4         | 4        | 3         |
| 0        | 1       | 1       | 1      | 2         | 3        | 1         | 4        | 0         |
| 2        | 0       | 4       | 3      | 1         | 0        | 1         | 0        | 1         |
| 5        | 1       | 5       | 5      | 5         | 0        | 5         | 0        | 5         |

|    |   |   |   |   |   |   |   |   |
|----|---|---|---|---|---|---|---|---|
| 3  | 5 | 3 | 4 | 3 | 3 | 2 | 4 | 2 |
| 0  | 1 | 4 | 4 | 0 | 0 | 3 | 1 | 0 |
| 1  | 3 | 4 | 4 | 5 | 4 | 4 | 4 | 4 |
| 5  | 5 | 4 | 4 | 3 | 1 | 2 | 1 | 3 |
| 5  |   | 2 |   | 0 |   | 5 |   | 5 |
| 1  | 1 | 4 | 4 | 3 | 3 | 3 | 1 | 1 |
| 0  | 0 | 5 | 4 | 0 | 4 | 1 | 0 | 0 |
| 0  | 0 | 5 | 4 | 0 | 3 | 3 | 3 | 2 |
| -1 |   | 0 |   | 3 |   | 0 |   | 0 |
| 1  | 0 | 5 | 5 | 1 | 0 | 3 | 1 | 3 |
| 0  | 0 | 3 | 4 | 4 | 4 | 1 | 0 | 1 |
| 0  | 0 | 0 | 0 | 0 | 5 | 0 | 2 | 0 |
| 0  | 1 | 2 | 5 | 0 | 1 | 0 | 2 | 4 |
| 3  | 0 | 4 | 3 | 3 | 3 | 0 | 0 | 4 |
|    | 5 |   | 3 |   | 4 |   | 0 |   |
| 5  | 3 | 4 | 4 | 2 | 0 | 0 | 3 | 0 |
| 3  | 2 | 4 | 3 | 1 | 0 | 0 | 0 | 2 |
| 0  | 3 | 2 | 5 | 2 | 0 | 0 | 1 | 0 |
| 0  | 1 | 3 | 4 | 4 | 3 | 4 | 5 | 1 |



| fsheet6m | rresult8wk | rresult6m | coresult8w | coresult6m | cotinine8w | cotinine6m | support8w | support6m |
|----------|------------|-----------|------------|------------|------------|------------|-----------|-----------|
| 3        |            |           | 2          | 0          | 2          | 0          | 4         | 5         |
| 3        |            |           | 3          | 4          | 2          | 4          | 5         | 4         |
| 0        |            |           | 2          | 2          | 0          | 0          | 3         | 4         |
| 2        |            |           | 1          | 1          | 1          | 1          | 3         | 3         |
| 0        |            |           | 5          | 5          | 3          | 4          | 5         | 4         |
| 0        |            |           | 2          | 0          | 2          | 0          | 4         | 4         |
| 3        |            |           | 4          | 4          | 4          | 4          | 5         | 4         |
| 2        |            |           | 4          | 4          | 3          | 4          | 5         | 4         |
| 0        |            |           | 0          | 0          | 4          | 0          | 4         | 4         |
| 4        |            |           | 3          | 4          | 0          | 0          | 1         | 2         |
|          |            |           | 4          |            | 3          |            | 4         |           |
| 1        |            |           | 2          | 0          | 2          | 0          | 2         | 3         |
| 0        |            |           | 0          | 0          | 1          | 0          | 0         | 2         |
| 4        |            |           | 4          | 4          | 3          | 3          | 3         | 3         |
| 1        |            |           | 2          | 3          | 4          | 3          | 4         | 4         |
| 0        |            |           | 5          | 3          | 5          | 2          | 5         | 2         |
| 4        |            |           | 4          | 4          | 4          | 3          | 4         | 4         |
| 0        |            |           | 0          | 0          | 5          | 4          | 1         | 0         |
|          |            |           | 4          |            | 3          |            | 5         |           |
|          |            |           | 0          |            | 0          |            | 4         |           |
| 0        |            |           | 3          | 4          | 5          | 2          | 4         | 4         |
| 4        |            |           | 4          | 4          | 2          | 2          | 5         | 5         |
| 2        | 4          | 5         | 3          | 3          | 4          | 3          | 3         | 3         |
| 5        | 0          | 5         | 0          | 5          | 0          | 5          | 5         | 5         |
| 4        | 0          | 3         | 0          | 3          | 0          | 3          | 4         | 3         |
| 0        | 5          | 5         | 5          | 3          | 4          | 4          | 5         | 5         |
| 2        | 2          | 2         | 3          | 2          | 3          | 2          | 4         | 5         |
| 2        | 3          | 3         | 2          | 3          | 4          | 3          | 4         | 4         |
| 3        | 3          | 3         | 3          | 3          | 3          | 3          | 4         | 4         |
| 2        | 2          | 4         | 1          | 2          | 1          | 3          | 4         | 4         |
| 3        |            |           | 4          | 4          | 4          | 4          | 5         | 4         |
| 4        |            |           | 4          | 4          | 4          | 4          | 4         | 4         |
| 3        | 5          | 5         | 5          | 3          | 5          | 4          | 5         | 4         |
| 3        | 2          | 1         | 2          | 1          | 2          | 1          | 0         | 1         |
| 3        | 4          | 4         | 3          | 4          | 2          | 3          | 4         | 1         |
| 0        |            |           | 4          | 0          | 2          | 4          | 5         | 5         |
| 4        |            |           | 3          | 4          | 5          | 4          | 2         | 4         |
| 1        | 2          | 3         | 2          | 3          | 2          | 3          | 3         | 4         |
| 0        | 3          | 3         | 2          | 2          | 2          | 2          | 3         | 4         |
| 2        |            |           | 2          | 4          | 3          | 2          | 5         | 5         |
| 1        | 3          | 2         | 5          | 2          | 3          | 2          | 4         | 4         |
| 0        | 4          | 0         | 2          | 4          | 4          | 5          | 3         | 2         |
| 3        |            |           | 1          | 3          | 3          | 3          | 4         | 4         |
| 0        | 1          | 2         | 1          | 2          | 1          | 2          | 4         | 4         |
| 1        | 5          | 1         | 5          | 1          | 5          | 1          | 4         | 4         |
| 3        | 4          | 4         | 4          | 4          | 4          | 3          | 5         | 5         |
| 0        | 1          | 2         | 1          | 1          | 1          | 1          | 2         | 4         |
| 3        | 5          | 4         | 5          | 3          | 5          | 4          | 5         | 4         |

|   |   |   |   |   |   |   |   |    |
|---|---|---|---|---|---|---|---|----|
| 3 | 2 | 3 | 2 | 3 | 1 | 3 | 5 | 5  |
| 2 | 1 | 3 | 4 | 4 | 1 | 3 | 5 | 1  |
| 2 | 4 | 3 | 4 | 2 | 4 | 2 | 2 | -1 |
| 3 | 0 | 3 | 4 | 3 | 0 | 3 | 4 | 4  |
|   | 5 |   | 5 |   | 5 |   | 5 |    |
| 4 | 2 | 1 | 1 | 4 | 1 | 1 | 5 | 1  |
| 1 | 3 | 0 | 0 | 0 | 4 | 0 | 2 | 0  |
| 3 | 2 | 3 | 4 | 3 | 4 | 3 | 4 | 3  |
|   | 1 |   | 4 |   | 0 |   | 4 |    |
| 2 | 3 | 3 | 4 | 3 | 4 | 2 | 4 | 4  |
| 0 | 1 | 2 | 1 | 3 | 1 | 3 | 4 | 5  |
| 0 | 4 | 3 | 3 | 2 | 3 | 2 | 3 | 2  |
| 3 | 3 | 0 | 4 | 3 | 4 | 0 | 5 | 5  |
| 2 | 0 | 3 | 3 | 3 | 4 | 3 | 3 | 4  |
| 4 |   | 4 | 4 | 4 |   | 4 |   | 0  |
| 4 | 3 | 4 | 3 | 4 | 3 | 4 | 5 | 5  |
| 1 |   |   | 3 | 4 | 2 | 4 | 3 | 4  |
| 3 |   |   | 2 | 2 | 4 | 3 | 3 | 4  |
| 4 |   |   | 4 | 4 | 4 | 4 | 5 | 4  |



| friend8wk | family6m | family8wk | family6m | hyfcode1 8wk | hyfcode2 8wk | hyfcode1 8wk |
|-----------|----------|-----------|----------|--------------|--------------|--------------|
| 2         | 1        | 2         | 1        | 3            | 6            | 1            |
| 1         | 1        | 1         | 1        | 1            | 1            | 6            |
| 1         | 3        | 1         | 3        | 4            | 3            | 6            |
| 1         | 3        | 1         | 1        | 2            | 1            | 2            |
| 1         | 1        | 1         | 1        | 1            | 1            | 2            |
| 1         | 1        | 1         | 1        | 1            | 1            | 0            |
| 3         | 3        | 3         | 3        | 4            | 5            | 4            |
| 1         | 3        | 1         | 1        | 2            | 1            | 2            |
| 0         | 2        | 0         | 2        | 0            | 0            | 2            |
| 2         | 3        | 1         | 1        | 4            | 5            | 2            |
| 1         |          | 1         |          | 1            | 1            | 0            |
| 3         | 3        | 3         | 3        | 4            | 5            | 4            |
| 1         | 3        | 1         | 1        | 2            | 1            | 2            |
| 3         | 1        | 3         | 1        | 3            | 6            | 2            |
| 2         | 3        | 2         | 3        | 4            | 5            | 3            |
| 3         | 3        | 3         | 3        | 4            | 5            | 4            |
| 1         | 1        | 1         | 1        | 1            | 1            | 2            |
| 3         | 3        | 3         | 3        | 1            | 3            | 1            |
| 1         |          | 1         |          | 2            | 1            | 0            |
| 3         |          | 1         |          | 3            | 6            | 0            |
| 1         | 1        | 1         | 1        | 2            | 1            | 6            |
| 3         | 1        | 3         | 1        | 1            | 4            | 1            |
| 1         | 1        | 1         | 1        | 2            | 1            | 2            |
| 1         | 1        | 1         | 1        | 6            | 4            | 3            |
| 1         | 1        | 1         | 1        | 1            | 1            | 2            |
| 1         | 1        | 1         | 1        | 2            | 1            | 2            |
| 1         | 1        | 1         | 1        | 1            | 1            | 1            |
| 1         | 3        | 1         | 3        | 1            | 4            | 2            |
| 2         | 1        | 2         |          | 0            | 0            | 1            |
| 1         | 1        | 1         | 1        | 2            | 1            | 2            |
| 3         | 1        | 3         | 1        | 4            | 5            | 2            |
| 1         | 1        | 1         | 1        | 1            | 1            | 1            |
| 1         | 1        | 1         | 1        | 2            | 1            | 2            |
| 3         | 3        | 3         | 3        | 5            | 1            | 5            |
| 1         | 1        | 1         | 1        | 2            | 1            | 1            |
| 1         | 1        | 1         | 1        | 1            | 1            | 1            |
| 1         | 1        | 1         | 1        | 2            | 1            | 2            |
| 1         | 1        | 1         | 1        | 3            | 2            | 1            |
| 1         | 3        | 1         | 1        | 2            | 1            | 2            |
| 1         | 3        | 1         | 3        | 1            | 1            | 2            |
| 1         | 1        | 1         | 1        | 1            | 1            | 2            |
| 1         | 1        | 1         | 1        | 2            | 1            | 1            |
| 1         | 1        | 1         | 1        | 2            | 1            | 2            |
| 1         | 1        | 1         | 1        | 1            | 2            | 4            |
| 1         | 1        | 1         | 1        | 2            | 1            | 0            |
| 1         | 1        | 1         | 1        | 1            | 1            | 2            |
| 1         | 1        | 1         | 1        | 2            | 1            | 2            |
| 1         | 1        | 1         | 1        | 1            | 3            | 2            |

|   |   |   |   |   |   |   |   |
|---|---|---|---|---|---|---|---|
| 1 | 1 | 1 | 1 | 1 | 1 | 1 | 1 |
| 1 | 1 | 1 | 1 | 5 | 1 | 1 | 5 |
| 1 | 3 | 1 | 3 | 0 | 0 | 0 | 0 |
| 1 | 3 | 1 | 3 | 0 | 0 | 0 | 1 |
| 1 |   | 1 |   | 1 | 1 | 1 | 0 |
| 1 | 1 | 1 | 1 | 2 | 1 | 1 | 1 |
| 1 | 1 | 1 | 1 | 2 | 1 | 1 | 5 |
| 1 | 1 | 1 | 1 | 2 | 1 | 1 | 5 |
| 1 |   | 1 |   | 1 | 6 | 1 | 0 |
| 1 | 1 | 1 | 1 | 5 | 1 | 1 | 2 |
| 1 | 1 | 1 | 1 | 2 | 1 | 1 | 2 |
| 1 | 1 | 1 | 1 | 2 | 1 | 1 | 2 |
| 1 | 1 | 1 | 1 | 2 | 1 | 1 | 2 |
| 1 | 1 | 1 | 1 | 0 | 0 | 0 | 3 |
| 1 | 1 | 1 | 1 | 2 | 1 | 1 | 2 |
|   | 3 |   | 1 | 2 | 1 | 1 | 1 |
| 1 |   | 1 |   | 2 | 1 | 1 | 1 |
| 1 | 1 | 1 | 1 | 2 | 1 | 1 | 1 |
| 1 | 1 | 1 | 1 | 2 | 1 | 1 | 2 |
| 1 | 1 | 1 | 1 | 2 | 1 | 1 | 2 |





| hyfcode2 | 6m | attend8wk | attend6m | commentcode | commentco | cigscut | codiff6m | cofirsttolas |
|----------|----|-----------|----------|-------------|-----------|---------|----------|--------------|
| 1        | 5  | 0         | 10       | 5           | 15        |         | 28       |              |
| 2        | 2  | 0         |          | 9           | 12        |         | 11       |              |
| 2        | 5  | 1         | 0        | 0           | 20        |         | 8        |              |
| 1        | 1  | 1         | 0        | 0           | 10        | 4       | 4        |              |
| 1        | 7  | 1         | 0        | 0           | 10        | 12      | 12       |              |
| 0        | 7  | 1         | 0        | 0           | 20        | 42      | 42       |              |
| 5        | 4  | 0         | 2        | 8           | 3         |         | 5        |              |
| 1        | 2  | 0         | 8        | 1           | 15        |         | 8        |              |
| 2        | 5  | 1         | 7        |             | 22        |         | 3        |              |
| 1        | 5  | 1         | 0        | 0           | 10        | 10      | 10       |              |
|          | 6  | 0         | 1        |             |           |         | 20       |              |
| 5        | 7  | 0         |          | 5           | 20        |         | 12       |              |
| 1        | 1  | 1         | 6        | 2           | 20        | 23      | 23       |              |
| 1        | 8  | 1         | 9        |             | 15        | 41      | 41       |              |
| 6        | 2  | 0         | 4        |             | 4         |         | 1        |              |
| 5        | 2  | 0         | 6        | 5           | 6         |         | 17       |              |
| 1        | 7  | 1         | 0        | 0           | 15        | 39      | 39       |              |
| 1        | 1  | 0         | 4        |             | 9         |         |          |              |
|          | 6  | 0         | 1        |             |           |         | 5        |              |
|          | 6  | 0         | 1        |             |           |         | 30       |              |
| 2        | 6  | 0         | 9        |             |           |         | 1        |              |
| 1        | 7  | 1         |          | 6           | 17        | 33      | 33       |              |
| 1        | 2  | 0         | 9        |             | 10        |         | 7        |              |
| 4        | 6  | 1         |          | 8           | 30        | 13      | 13       |              |
| 1        | 6  | 1         | 9        |             | 20        |         | 9        |              |
| 1        | 4  | 1         |          | 4           | 20        | 15      | 15       |              |
| 1        | 8  | 1         | 8        |             | 10        | 17      | 17       |              |
| 1        | 6  | 1         | 0        | 0           | 5         | -18     | -18      |              |
| 1        | 7  | 1         | 10       |             | 12        | 11      | 11       |              |
| 1        | 6  | 0         |          | 8           | 9         |         | 6        |              |
| 1        | 7  | 1         |          | 3           | 18        | 29      | 29       |              |
| 1        | 6  | 0         | 9        | 6           | 2         | 22      | 22       |              |
| 1        | 6  | 0         | 8        |             | 15        |         | 10       |              |
| 2        | 1  | 0         | 5        |             | 7         |         | 0        |              |
| 1        | 7  | 0         | 0        | 0           | 15        |         | 20       |              |
| 1        | 8  | 1         |          | 6           | -5        | 0       | 0        |              |
| 1        | 3  | 1         |          | 3           | 14        | 16      | 16       |              |
| 1        | 6  | 0         | 2        |             | 12        |         | 18       |              |
| 1        | 6  | 1         | 0        | 0           | 25        | 41      | 41       |              |
| 1        | 3  | 0         | 4        | 6           |           |         | 48       |              |
| 1        | 8  | 1         | 0        | 0           | 10        | -7      | -7       |              |
| 2        | 2  | 0         | 3        |             |           |         | 5        |              |
| 1        | 2  | 0         |          | 8           | 2         |         | 2        |              |
| 2        | 8  | 1         |          |             | 12        | 19      | 19       |              |
| 0        | 5  | 0         | 2        |             | 5         |         | 27       |              |
| 1        | 8  | 1         |          | 3           | 0         | -6      | -6       |              |
| 1        | 1  | 0         | 5        |             | 0         |         | 0        |              |
| 1        | 6  | 0         | 7        | 1           | 5         |         | 29       |              |

|   |   |   |   |   |    |     |     |
|---|---|---|---|---|----|-----|-----|
| 1 | 6 | 1 |   | 9 | 3  | 9   | 9   |
| 7 | 4 | 0 | 2 |   | 0  |     | 26  |
| 0 | 2 | 0 | 2 | 9 | 5  |     | -3  |
| 1 | 8 | 1 | 2 |   | 5  | 10  | 10  |
|   | 7 | 0 | 1 |   |    |     | 33  |
| 1 | 8 | 1 |   | 2 | 8  | 16  | 16  |
| 1 | 1 | 0 |   | 1 | 9  |     |     |
| 7 | 3 | 1 |   | 9 | 12 | 12  | 12  |
|   | 8 | 0 | 1 |   |    |     | 17  |
| 1 | 3 | 0 | 8 | 8 | 15 |     | 39  |
| 1 | 8 | 1 | 7 |   | 10 | -6  | -6  |
| 1 | 1 | 0 |   | 3 |    |     | 0   |
| 6 | 8 | 0 | 5 |   |    |     | 13  |
| 1 | 1 | 0 | 2 |   | 15 |     | 3   |
|   | 2 | 0 | 8 |   |    |     | 7   |
|   | 7 | 0 | 3 |   |    |     | 5   |
| 1 | 7 | 0 | 2 | 6 | 7  |     | 20  |
| 1 | 2 | 1 |   | 6 | -2 | -13 | -13 |
| 1 | 4 | 1 |   | 6 | 10 | 22  | 22  |



| cofirstto8w | cofirstto8lt | newcopdri | hypocopdclinic | summotivatr2 | summotivatr1 | newcopdsc |
|-------------|--------------|-----------|----------------|--------------|--------------|-----------|
| 28          | 28           |           |                | 16           | 15           |           |
|             | 11           |           |                | 25           | 20           |           |
|             | 11           |           |                | 16           | 16           |           |
|             | 0            |           |                | 17           | 10           |           |
| 16          | 16           |           |                | 25           | 30           |           |
| 43          | 42           |           |                | 11           | 22           |           |
|             | 5            |           |                | 24           | 27           |           |
|             | 8            |           |                | 25           | 28           |           |
| 3           | 3            |           |                | 5            | 9            |           |
|             | 2            |           |                | 26           | 11           |           |
| 20          | 20           |           |                |              | 25           |           |
|             | 12           |           |                | 18           | 17           |           |
|             | 0            |           |                | 3            | 8            |           |
| 43          | 36           |           |                | 30           | 26           |           |
|             | 1            |           |                | 16           | 28           |           |
|             | 17           |           |                | 18           | 36           |           |
| 37          | 39           |           |                | 25           | 33           |           |
|             |              |           |                | 18           | 16           |           |
| 5           | 5            |           |                | 15           | 15           |           |
| 30          | 30           |           |                | 11           | 11           |           |
|             | 1            |           |                | 20           | 33           |           |
| 38          | 38           | 11        | 11             | 31           | 34           | 11        |
|             | 7            | 9         | 9              | 29           | 33           | 9         |
| 15          | 15           | 7         | 7              | 41           | 13           | 7         |
|             | 9            | 11        | 11             | 19           | 10           | 11        |
|             | 15           | 10        | 10             | 29           | 38           | 10        |
| 18          | 18           | 9         | 13             | 23           | 29           | 9         |
| 8           | 8            | 8         | 8              | 25           | 22           | 8         |
| 18          | 18           | 4         | 8              | 32           | 24           | 4         |
| 6           | 6            | 4         | 8              | 27           | 24           | 4         |
| 34          | 34           | 12        | 12             | 28           | 35           | 12        |
| 11          | 11           | 4         | 4              | 24           | 31           | 4         |
| 10          | 10           | 10        | 10             | 32           | 38           | 10        |
|             | 0            | 3         | 7              | 13           | 18           | 3         |
| 20          | 20           | 3         | 7              | 26           | 18           | 3         |
| 13          | 13           | 6         | 10             | 27           |              | 6         |
|             | 22           | 5         | 5              | 28           |              | 5         |
| 18          | 18           | 11        | 11             | 24           | 20           | 11        |
| 42          | 42           | 7         | 11             | 19           | 17           | 7         |
|             | 48           | 11        | 11             | 19           |              | 11        |
| 4           | 4            | 12        | 12             | 23           | 32           | 12        |
|             | 5            | 6         | 6              | 11           | 20           | 6         |
|             | 2            | 6         | 10             | 28           |              | 6         |
| 22          | 22           | 2         | 6              | 20           | 15           | 2         |
|             | 20           | 1         | 5              | 26           | 37           | 1         |
| 14          | 14           | 2         | 6              | 31           | 24           | 2         |
|             | 0            | 1         | 5              | 12           | 16           | 1         |
| 29          | 29           | 4         | 8              | 24           | 50           | 4         |

|    |    |   |   |    |    |   |
|----|----|---|---|----|----|---|
|    | 21 | 1 | 5 | 32 | 22 | 1 |
|    | 26 | 1 | 5 | 24 | 23 | 1 |
|    | -3 | 1 | 5 | 26 | 36 | 1 |
| 29 | 29 | 3 | 7 | 30 | 25 | 3 |
| 33 | 33 | 1 | 5 |    | 37 | 1 |
| 40 | 40 | 6 | 6 | 24 | 26 | 6 |
|    |    | 1 | 5 | 9  | 17 | 1 |
|    | 20 | 1 | 5 | 28 | 24 | 1 |
| 17 | 17 | 1 | 5 |    | 12 | 1 |
|    | 39 | 1 | 5 | 25 | 31 | 1 |
| 6  | 6  | 2 | 6 | 23 | 19 | 2 |
|    | 0  | 6 | 6 | 20 | 18 | 6 |
| 13 | 13 | 1 | 5 | 23 | 24 | 1 |
|    | 3  | 1 | 5 | 26 | 23 | 1 |
|    | 7  | 3 | 7 | 27 |    | 3 |
|    | 5  | 1 | 5 | 35 | 30 | 1 |
| 20 | 20 | 1 | 1 | 19 | 18 | 1 |
|    | -2 | 4 | 8 | 21 | 13 | 4 |
|    | 28 | 1 | 5 | 33 | 25 | 1 |



---

oldrespir oldlifetime newcopdlife

|    |    |    |
|----|----|----|
| 11 | 60 | 60 |
| 9  | 50 | 50 |
| 7  | 50 | 50 |
| 7  | 50 | 50 |
| 6  | 50 | 60 |
| 9  | 50 | 50 |
| 4  | 47 | 50 |
| 4  | 15 | 15 |
| 4  | 40 | 40 |
| 8  | 60 | 65 |
| 4  | 40 | 40 |
| 10 | 50 | 50 |
| 3  | 37 | 37 |
| 3  | 44 | 44 |
| 6  | 55 | 55 |
| 5  | 43 | 43 |
| 7  | 50 | 65 |
| 7  | 54 | 54 |
| 7  | 60 | 65 |
| 8  | 50 | 65 |
| 2  | 15 | 45 |
| 6  | 60 | 60 |
| 2  | 30 | 30 |
| 1  | 19 | 19 |
| 2  | 23 | 23 |
| 1  | 24 | 24 |
| 4  | 50 | 50 |



|   |    |    |
|---|----|----|
| 1 | 22 | 22 |
| 1 | 19 | 19 |
| 1 | 15 | 15 |
| 3 | 31 | 31 |
| 1 | 14 | 14 |
| 2 | 29 | 47 |
| 1 | 18 | 18 |
| 1 | 27 | 27 |
| 1 | 22 | 22 |
| 1 | 16 | 16 |
| 2 | 38 | 38 |
| 2 | 35 | 47 |
| 1 | 17 | 17 |
| 1 | 32 | 32 |
| 3 | 43 | 43 |
| 1 | 18 | 18 |
| 1 | 32 | 32 |
| 4 | 40 | 40 |
| 1 | 19 | 19 |
